# Supplementary material for: Scarcity of fixed carbon transfer in a model microbial phototroph–heterotroph interaction
Source: PubMed Central journal article supplement (PMC11316394; doi:10.1093/ismejo/wrae140), 2024-07-24
Supplement: supplementaryinformation_dupuis_etal_wrae140.pdf [file supplementaryinformation_dupuis_etal_wrae140.pdf]

## SUPPLEMENTARY INFORMATION

### Scarcity of fixed carbon transfer in a model microbial phototroph-heterotroph interaction

Sunnyjoy Dupuis<sup>1,2</sup>, Usha F. Lingappa<sup>2</sup>, Xavier Mayali<sup>3</sup>, Eve S. Sindermann<sup>2</sup>, Jordan L. Chastain<sup>2,4</sup>, Peter K. Weber<sup>3</sup>, Rhona Stuart<sup>3</sup>, Sabeeha S. Merchant<sup>1,2,5,6</sup>

<sup>1</sup>Department of Plant and Microbial Biology, University of California, Berkeley, CA 94720, USA

<sup>2</sup>California Institute for Quantitative Biosciences (QB3), University of California, Berkeley, CA 94720, USA

<sup>3</sup>Physical and Life Sciences Directorate, Lawrence Livermore National Laboratory, Livermore, CA 94550, USA

<sup>4</sup>College of Chemistry, University of California, Berkeley, CA 94720, USA

<sup>5</sup>Department of Molecular and Cell Biology, University of California, Berkeley, CA 94720, USA

<sup>6</sup>Division of Environmental Genomics and Systems Biology, Lawrence Berkeley National Laboratory, Berkeley, CA, USA

#### **Other supplementary materials for this manuscript include the following:**

Supplementary Data File S1: All data underlying this article (excel file).

Supplementary Data File S2: Media composition (excel file).

## SUPPLEMENTARY METHODS

### *C. reinhardtii* strain haplotype determination

The haplotype of the wild-type *C. reinhardtii* strain used in this study was determined by allele-specific amplification as previously described [1]. Genomic DNA was extracted using CTAB (hexadecyltrimethylammonium bromide). Cell pellets were resuspended in 0.7 ml 60°C CTAB buffer (2% CTAB, 100 mM Tris-HCl, pH 8, 20 mM EDTA, 1.4 M NaCl, 0.2% beta-mercaptoethanol, 0.1 mg/ml proteinase K) and incubated for 1 h at 60°C. Then, DNA was extracted by addition of 0.7 ml chloroform/isoamylalcohol (24:1), inversion for 2 min, centrifugation at 16,000 xg for 10 min at 4°C, and collection of the aqueous phase. DNA was precipitated by overnight incubation in 50% isopropanol at -20°C. DNA was then collected by centrifugation at 16,000 xg for 15 min at 4°C, and was then washed with cold 70% ethanol. DNA was air-dried for 15 min at room temperature and resuspended in purified water.

PCR was performed using 300 nM allele-specific primers, 2.5 ng/μl template DNA, and 10 μl iTaq Universal SYBR Green Supermix (Bio-Rad) in 20 μl reactions using a CFX96 Optical Thermocycler (Bio-Rad). Reactions were incubated at 95°C for 30 s followed by 30 cycles of 95°C for 5 s and 63°C for 30 s. Allele-specific primers were the same as previously described [1]. The haplotype of the wild-type *C. reinhardtii* was compared to previously published haplotypes of strains CC-5390 (CC-4351 rescued with the *ARG7* gene), CC-124 (137c *mt*-), and S24- [1].

### Chlorophyll measurement

Chlorophyll (Chl) content was measured as previously described [2]. 1 ml of culture was collected by centrifugation at 16,000 xg for 1 min and the supernatant was discarded. Cell pellets were stored at -80°C until analysis. Pellets were thawed at ambient temperature and then resuspended in 1 ml 80:20 acetone:methanol. Samples were incubated on ice for 5 min, and then starch was collected by centrifugation at 16,000 xg for 2 min. Absorbance of the supernatant was measured at 647 nm, 664 nm, and 750 nm using a UV-6300PC Double Beam Spectrophotometer (VWR, PA, USA). As  $Abs_{750}$  was below the detection limit, total Chl was calculated as  $Chls\ a + b\ (\mu g/ml) = (17.76 \times Abs_{646}) + (7.34 \times Abs_{663})$  and was then normalized to the *C. reinhardtii* cells in the sample.

### $F_v/F_m$ measurement

The maximum quantum efficiency of photosystem II ( $F_v/F_m$ ) was measured using a Walz IMAGING-PAM MAXI Chlorophyll Fluorescence System equipped with an IMAG-K7 CCD Camera (Heinz Walz GmbH, Effeltrich, Germany). 300 μl culture was placed in a 96-well plate and dark-adapted for 15 min prior to fluorescence measurement.  $F_v/F_m$  was calculated as  $(F_m - F_o)/F_m$ , where  $F_m$  is the maximum fluorescence measured upon a saturating pulse and  $F_o$  is the minimal fluorescence of dark-adapted cells in the dark.

## SUPPLEMENTARY FIGURES

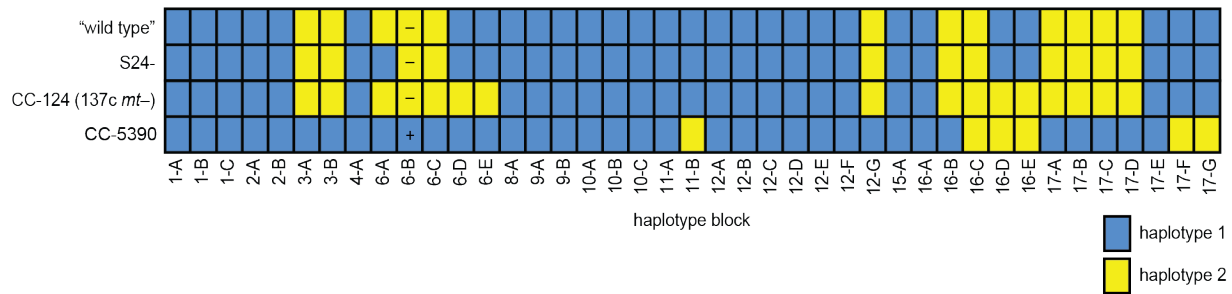

**SI Figure 1: The *C. reinhardtii* “wild type” used in this study is closely related to strain S24-**

The haplotype of the *C. reinhardtii* “wild type” was determined by allele-specific amplification of genomic DNA and was compared to the reported haplotypes of related strains (S24- and CC-124) and of CC-5390 [1]. Haplotype is indicated at 41 haplotype blocks across the *C. reinhardtii* genome: blue represents haplotype 1, yellow represents haplotype 2, and mating type is indicated as + or – at the mating type locus. Of the *C. reinhardtii* strains for which a haplotype has been reported, the wild-type strain used in this study was most similar to S24-.

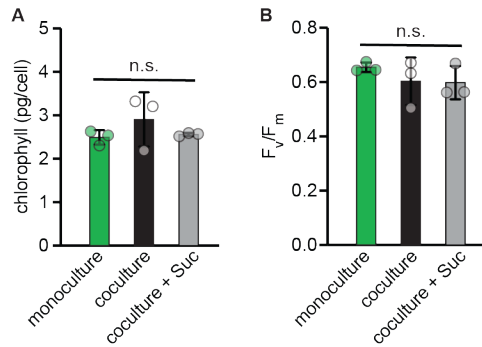

**SI Figure 2: *M. japonicum* does not impact chlorophyll content nor  $F_v/F_m$  of wild-type *C. reinhardtii*.**

Triplicate cultures ( $n = 3$ ) were inoculated with or without 150  $\mu\text{g/ml}$  sucrose and maintained under continuous light, bubbled with air, and shaken at 110 rpm. (A) Chlorophyll content normalized to the number of *C. reinhardtii* cells in the cultures 72 h after inoculation. (B)  $F_v/F_m$  of cultures 72 h after inoculation. Differences were not significant (n.s.) by two-tailed Student’s  $t$ -test ( $p > 0.05$ ).

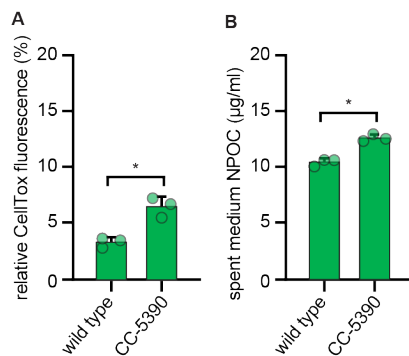

**SI Figure 3: *C. reinhardtii* strain CC-5390 is more prone to cell lysis and release of organic carbon into the medium.**

Triplicate cultures ( $n = 3$ ) of *C. reinhardtii* wild type and cell wall reduced strain CC-5390 were maintained under continuous light, bubbled with air, and shaken at 125 rpm. (A) The degree of  $C.$

*reinhardtii* cell lysis 72 h after inoculation estimated by CellTox Green fluorescence, reported relative to a 100% killed control. (B) NPOC in spent medium sampled 72 h after inoculation. Error bars represent the standard deviation from the mean. Asterisks indicate significant differences by Student's *t*-test ( $p < 0.05$ ).

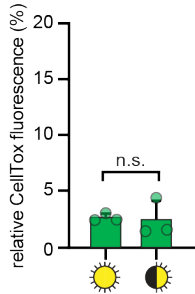

**SI Figure 4: Light regime does not impact *C. reinhardtii* cell lysis.**

Triplicate cultures ( $n = 3$ ) of cell wall reduced strain CC-5390 were maintained in semi-continuous culture in parallel photobioreactors under continuous light or diurnal light (12-h-light/12-h-dark) and bubbled with ambient air. The degree of *C. reinhardtii* cell lysis estimated by CellTox Green fluorescence, reported relative to a 100% killed control, was not significantly different under the two light regimes by two-tailed Student's *t*-tests ( $p = 0.86$ ). Error bars represent the standard deviation from the mean.

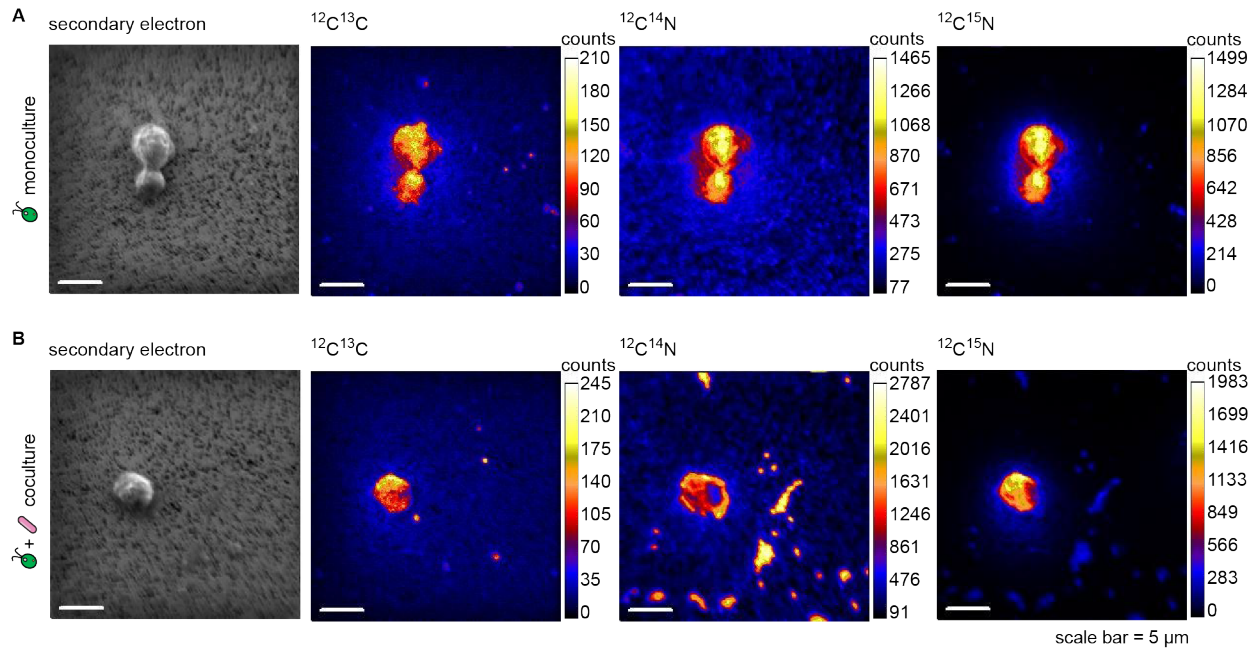

**SI Figure 5: Representative raw nanoSIMS images.**

Representative raw nanoSIMS secondary electron images,  $^{12}\text{C}^{13}\text{C}$ ,  $^{12}\text{C}^{14}\text{N}$ , and  $^{12}\text{C}^{15}\text{N}$  signals from (A) *C. reinhardtii* monoculture and (B) coculture with *M. japonicum*. Algal cells are clearly visible in the scanning electron,  $^{12}\text{C}^{13}\text{C}$ , and both CN images. Bacterial cells are most visible in the  $^{12}\text{C}^{14}\text{N}$  image. Micron-scale hotspots in the  $^{12}\text{C}^{13}\text{C}$  image are present in both the monoculture and coculture and do not line up with CN hotspots in the coculture; therefore, they are interpreted as algal debris (e.g., organelles, starch), rather than bacterial cells. Algal ROIs were circled using the

scanning electron and  $^{12}\text{C}^{13}\text{C}$  images and bacterial ROIs were circled using the  $^{12}\text{C}^{14}\text{N}$  image.

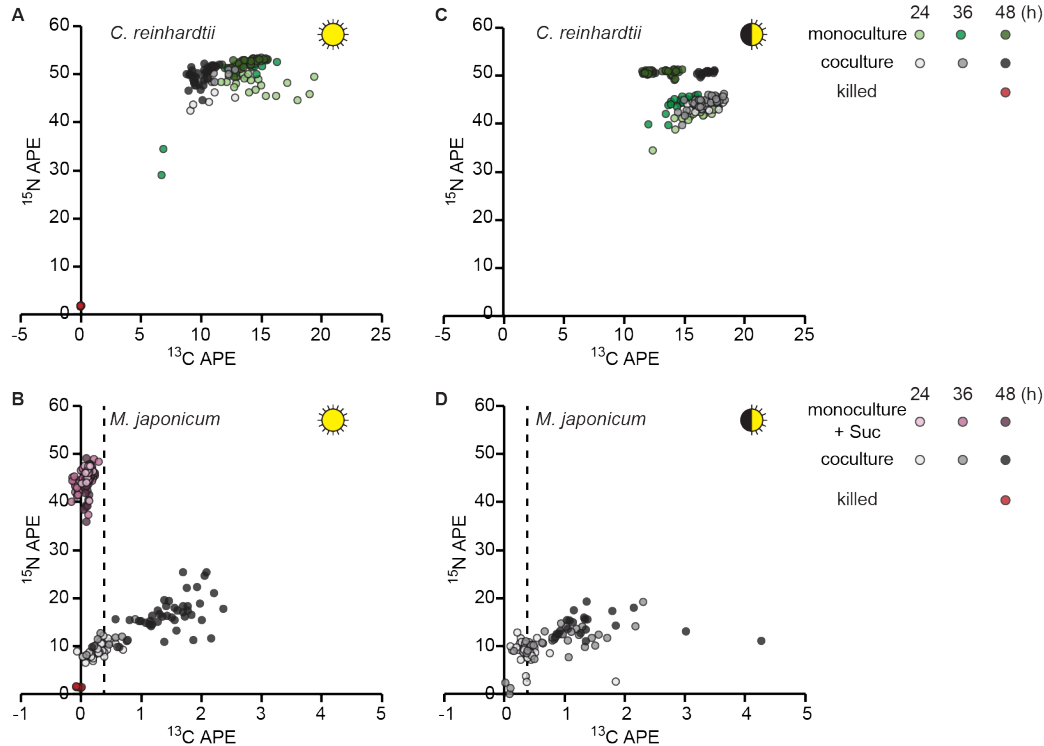

**SI Figure 6: Cross-plots of stable isotope enrichment data.**

Cross-plots of stable isotope enrichment at the indicated times after inoculation in *C. reinhardtii* cells (A, C) and *M. japonicum* cells (B, D), under continuous (A, B) and diurnal (C, D) light, from the coculture experiment described and shown in Fig. 3 plotted alongside monocultures and killed controls. *M. japonicum* grown on sucrose (pink points) is used to constrain possible  $^{13}\text{C}$  enrichment by direct  $^{13}\text{CO}_2$  uptake during heterotrophic growth (dashed line), which is well below the maximum  $^{13}\text{C}$  enrichment observed in cocultures.

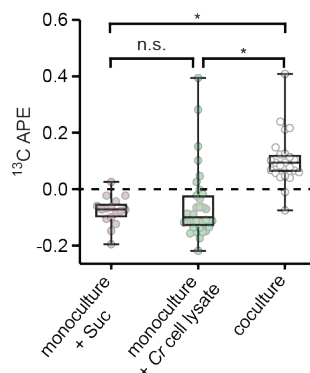

**SI Figure 7: *M. japonicum*  $^{13}\text{C}$  enrichment is significantly higher during growth with *C. reinhardtii* than during heterotrophic growth on sucrose or unlabeled *C. reinhardtii* cell lysate.**

Duplicate cultures ( $n = 2$ ) of *M. japonicum* were grown with  $150 \mu\text{g/ml}$  sucrose, in *C. reinhardtii* cell lysate, or in coculture with CC-5390 under diurnal light as described in Fig. 3 with 50% of their  $\text{NH}_4^+$  provided as  $^{15}\text{N}$  and with  $^{13}\text{CO}_2$  added to the air used to bubble the cultures starting 13

h after inoculation. Isotope enrichment was measured using nanoSIMS 48 h after inoculation.  $^{13}\text{C}$  atom percent enrichment (APE) data of  $n \geq 16$  individual cells is shown. Asterisks indicate significant differences between the conditions by two-tailed Student's  $t$ -test ( $p < 0.05$ ).

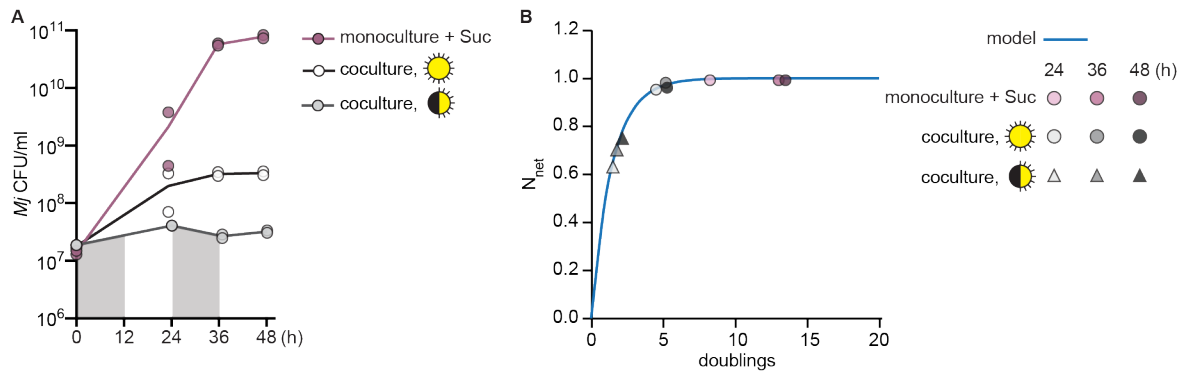

**SI Figure 8: Increase in *M. japonicum* density during stable isotope probing experiments informs  $N_{\text{net}}$  expected under balanced growth.**

(A) *M. japonicum* cell density during the experiment described in Fig. 3, Fig. 4, SI Fig. 6, and SI Fig. 9 over time after inoculation. The grey background indicates sample timepoints that occurred during the dark phase. (B) Model of  $N_{\text{net}}$  as biomass doubles (blue) was used to estimate the expected  $N_{\text{net}}$  of *M. japonicum* cells at each timepoint (circles and triangles) if the number of doublings in CFU/ml observed at that time corresponded to doublings in biomass.

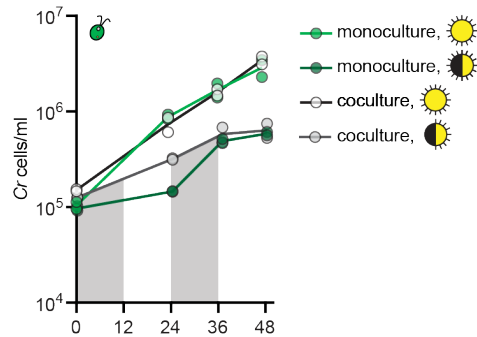

**SI Figure 9: *C. reinhardtii* cell density at the time of nanoSIMS sampling.**

Growth of cell wall reduced strain CC-5390 in continuous light or diurnal light (12-h-light/12-h-dark) with and without *M. japonicum*, during the experiment described in Fig. 3, SI Fig. 6, and SI Fig. 8. The grey backgrounds indicate sample timepoints that occurred during the dark phase.

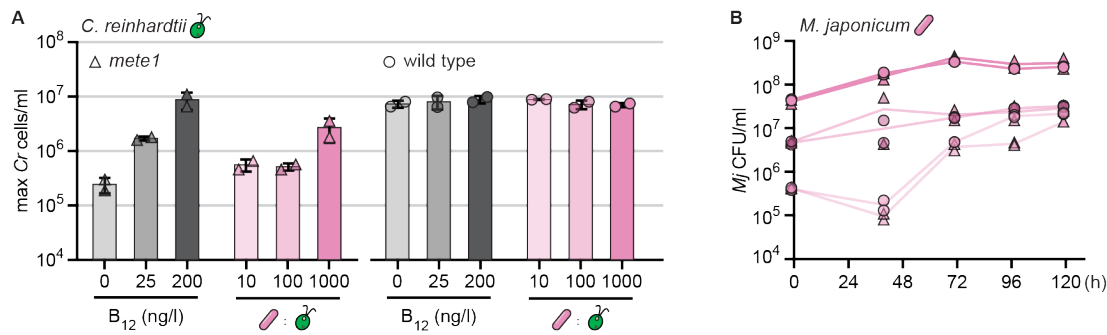

**SI Figure 10: Growth of *C. reinhardtii metel* strain is supported by vitamin B<sub>12</sub> and by *M.***

**japonicum.** Duplicate cultures of *C. reinhardtii* strains with B<sub>12</sub> or with *M. japonicum* maintained under diurnal light (12-h-light/12-h-dark) and shaking at 130 rpm. (A) Maximum cell density of *C. reinhardtii mete1* mutant (triangles, left) and parental wild-type strain (circles, right) 120 h after inoculation with various amounts of exogenous B<sub>12</sub> (grey) or with 10, 100, or 1000 bacterial cells per algal cell. Error bars represent the standard deviation from the mean. (B) Growth of *M. japonicum* with *C. reinhardtii mete1* (triangles) or wild type (circles) when inoculated at roughly 10, 100, and 1000 bacterial cells per algal cell (starting density of 5x10<sup>4</sup> *C. reinhardtii* cells/ml).

## SUPPLEMENTARY REFERENCES

1. Gallaher SD, Fitz-Gibbon ST, Glaesener AG, Pellegrini M, Merchant SS. Chlamydomonas genome resource for laboratory strains reveals a mosaic of sequence variation, identifies true strain histories, and enables strain-specific studies. *Plant Cell* 2015; **27**: 2335–2352.
2. Porra RJ, Thompson WA, Kriedemann PE. Determination of accurate extinction coefficients and simultaneous equations for assaying chlorophylls a and b extracted with four different solvents: verification of the concentration of chlorophyll standards by atomic absorption spectroscopy. *Biochimica et Biophysica Acta (BBA) - Bioenergetics* 1989; **975**: 384–394.
